# Supplementary material for: A novel “caterpillar with eggs” mesostructured iron sulfide as an anode for a Li-ion battery displaying stable electrochemical performance
Source: Royal Society of Chemistry journal article supplement (doi:10.1039/d1cc05421j), 2021-12-23
Supplement: d1cc05421j1.pdf [file d1cc05421j1.pdf]

Electronic Supplementary Information (ESI) for Chemical Communications. This journal is (c) The Royal Society of Chemistry 2021.

## Electronic Supplementary Information (ESI)

### **A novel caterpillar-with-eggs mesostructured iron sulfide as Li-ion battery anode displaying stable electrochemical performance**

Ting Zhou<sup>a</sup>, Yan Wang<sup>a</sup>, Yajun Zhu<sup>a</sup>, Tianli Han<sup>a,\*</sup>, Huigang Zhang<sup>b,c,\*</sup>, Jinyun Liu<sup>a,\*</sup>

#### **Experimental section**

##### **Chemical materials**

The  $\text{FeCl}_3 \cdot 6\text{H}_2\text{O}$ , urea, sulfur powder, trisodium citrate dehydrate were obtained from Aladdin. Tetraethyl silicate (TEOS) and iron acetylacetonate were purchased from Macklin. The  $\text{NH}_3 \cdot \text{H}_2\text{O}$ , glycerol,  $\text{FeSO}_4 \cdot 7\text{H}_2\text{O}$ , Sodium acetate, ethylene glycol, and anhydrous ethanol were purchased from Sinopharm Chemical Reagent Co., Ltd. All chemicals were used directly without further processing.

##### **Synthesis of 1D $\text{Fe}_3\text{O}_4@\text{SiO}_2$**

The  $\text{Fe}_3\text{O}_4$  nanospheres were prepared by dispersing evenly  $\text{FeCl}_3 \cdot 6\text{H}_2\text{O}$  (4.3 g), NaAc (4.0 g), and trisodium citrate dehydrate (1.0 g) in 70 ml of ethylene glycol. Then, a transparent solution was transferred into a Teflon-lined stainless steel autoclave and kept in an oven at 200 °C for 10 h. 0.05 g of  $\text{Fe}_3\text{O}_4$  nanoparticles were ultrasonically dispersed in 240 mL of anhydrous ethanol, and 30 mL of ammonia was added under a strong mechanical rate (800 rpm)

for 10 min. Subsequently, 2 mL of TEOS was slowly added under a low agitation (350 rpm). After stirring for 15 min, the solution was held under an external magnetic field for 100 s. Finally, after standing for 12 h, the 1D Fe<sub>3</sub>O<sub>4</sub>@SiO<sub>2</sub> was synthesized by washing with deionized water and ethanol, and drying at 60 °C for 12 h.

### **Preparation of 1D yolk-shell Fe<sub>3</sub>O<sub>4</sub>@void@FeOOH nanoneedles**

0.1 g of Fe<sub>3</sub>O<sub>4</sub>@SiO<sub>2</sub> was ultrasonically dispersed in a mixture of 30 mL H<sub>2</sub>O and 10 mL glycerin. Then, 0.7 g of FeSO<sub>4</sub>·7H<sub>2</sub>O was added to the above solution and ultrasonically dispersed for 30 min, which was placed in an autoclave and kept in an oven at 120 °C for 24 h. At last, the Fe<sub>3</sub>O<sub>4</sub>@SiO<sub>2</sub>@FeOOH was obtained by washing several times with deionized water. Then, the sample was ultrasonically dispersed in 10 mL ammonia and 25 mL deionized water, and placed in an autoclave at 150 °C for 8 h to obtain the Fe<sub>3</sub>O<sub>4</sub>@void@FeOOH.

### **Preparation of the 1D yolk-shell CWE FeS<sub>2</sub>**

The sample was prepared by separately placing the above Fe<sub>3</sub>O<sub>4</sub>@void@FeOOH and sulfur powder on either side of a tube furnace, which was calcined at 400 °C for 1 h under an Ar gas at a rate of 2 °C min<sup>-1</sup>.

### **Characterization**

The structure and phase of the sample were characterized by a field emission scanning electron microscopy (SEM, Hitachi S-8100), a transmission electron microscopy (TEM, HT-7700), and a X-ray diffractometer (XRD, Bruker D8 Advance). Elemental mappings were

presented on an energy dispersive X-ray spectrometer. An energy dispersive X-ray spectroscopy (EDS) tester was used to preform the composition of sample. The components and valence states of the product were analyzed by using X-ray photoelectron spectroscopy (XPS, ESCALAB 250). The BET surface area and pore-size distribution were measured using a Micrometritics ASAP 2460 analyzer.

### **Electrochemical measurements**

The electrochemical properties of 1D yolk-shell CWE FeS<sub>2</sub> were evaluated by using CR2032 coin cell system, which was assembled in an argon-filled glove box (H<sub>2</sub>O and O<sub>2</sub> < 0.01 ppm). The homogeneous slurry of the sample (70 w%), conductive carbon black (20 w%) and polyvinylidene fluoride (PVDF, 10 w%) in N-methyl-pyrrolidinone (NMP) was evenly coated on a copper foil, which was dried in a vacuum oven at 80 °C for 24 h, then was cut into a 12 mm-diameter discs. The electrolyte was prepared with 1 M of LiPF<sub>6</sub> in ethylene carbonate (EC) and ethyl methyl carbonate (EMC, volume ratio=1:1). Li metal was used as the counter electrode. The electrochemical performance of fresh cells was measured on a CT-4008 system (Shenzhen Neware Technology Co., Ltd). An electrochemical workstation (CHI-660D) was used to measure cyclic voltammetry (CV) in the potential range of 0.01-3 V and electrochemical impedance spectra (EIS) at a frequency of 0.01 to 100 kHz.

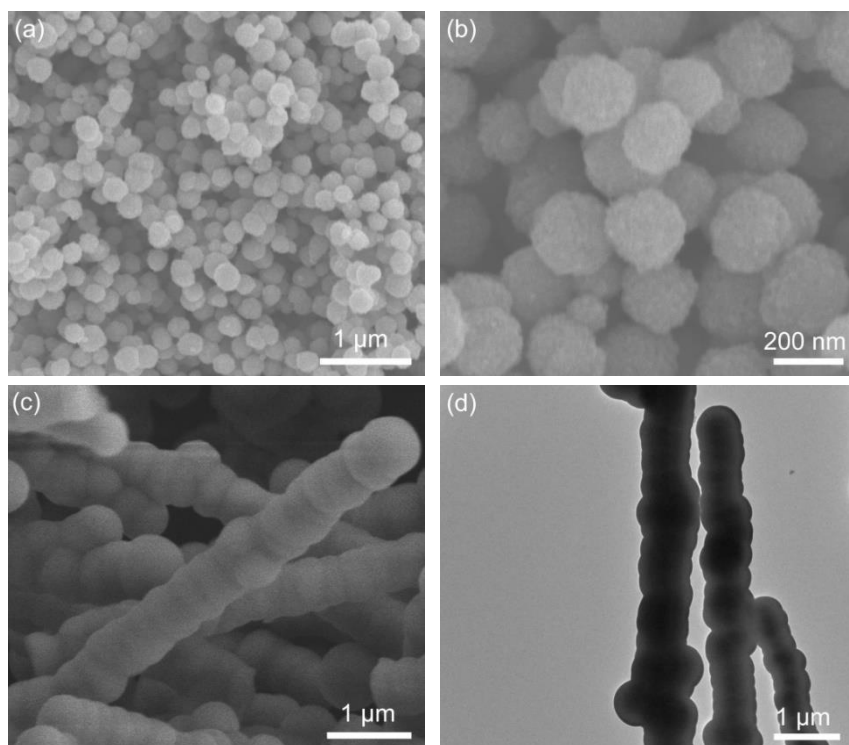

**Fig. S1** SEM images of the (a,b)  $\text{Fe}_3\text{O}_4$  nanospheres, (c)  $\text{Fe}_3\text{O}_4@\text{SiO}_2$ . (d) TEM images of  $\text{Fe}_3\text{O}_4@\text{SiO}_2$ .

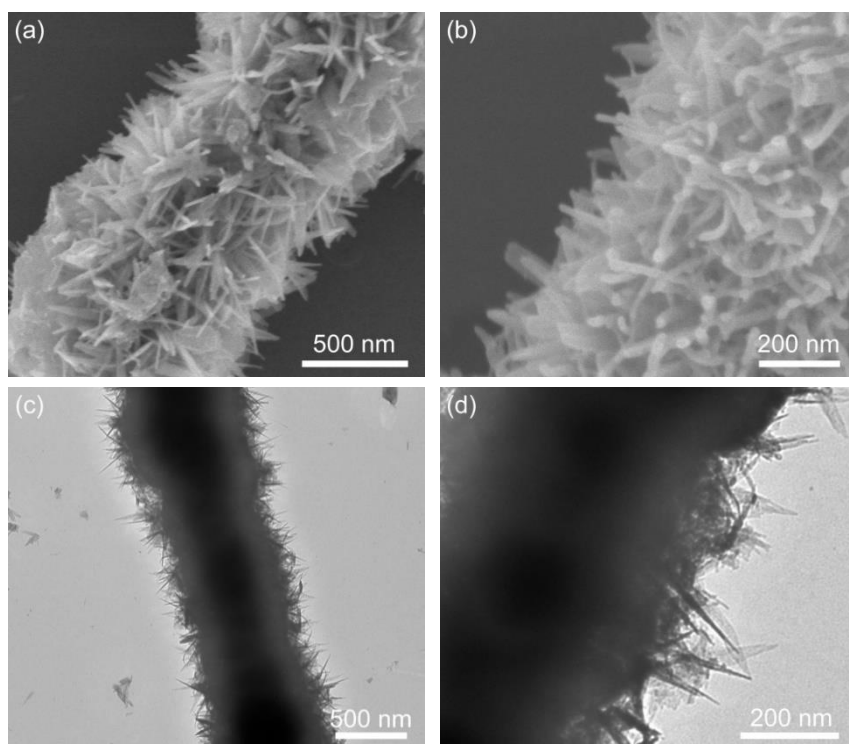

**Fig. S2** (a,b) SEM images of the  $\text{Fe}_3\text{O}_4@\text{SiO}_2@\text{FeOOH}$ . (c,d) TEM images of the  $\text{Fe}_3\text{O}_4@\text{SiO}_2@\text{FeOOH}$ .

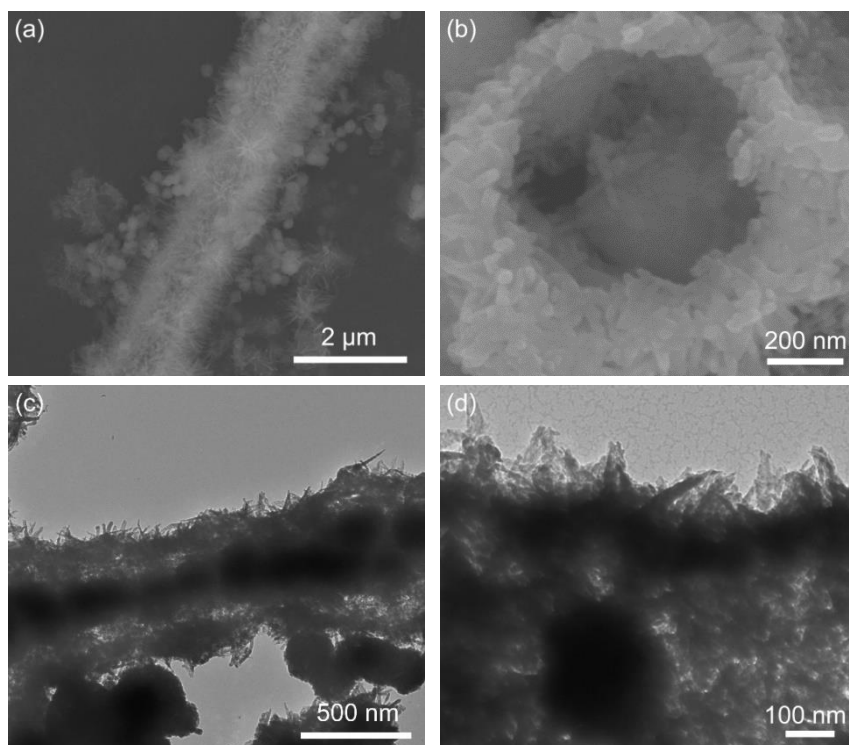

**Fig. S3** (a,b) SEM and (c,d) TEM images of CWE FeS<sub>2</sub>.

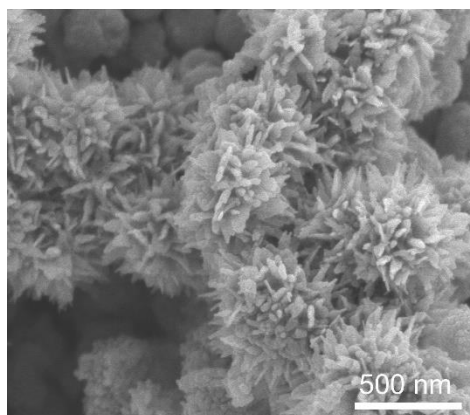

**Fig. S4** SEM image of the yolk-shell FeS<sub>2</sub> nanospheres.

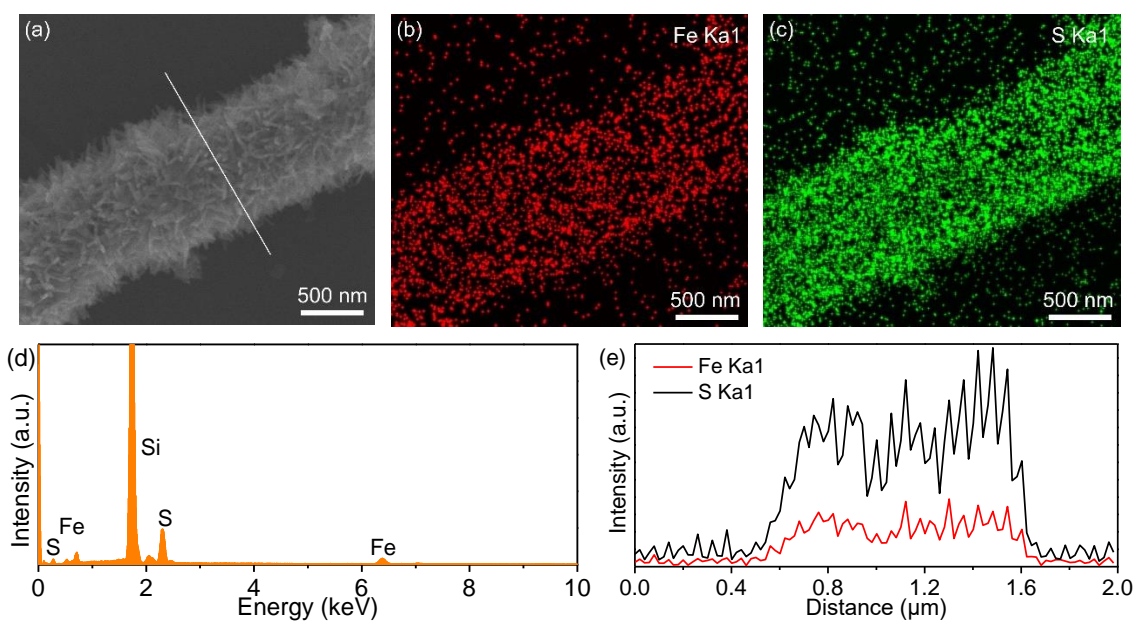

**Fig. S5** (a) SEM and (b,c) elemental mapping images of the CWE FeS<sub>2</sub>. (d) EDS spectrum. (e) The line-scanning profiles.

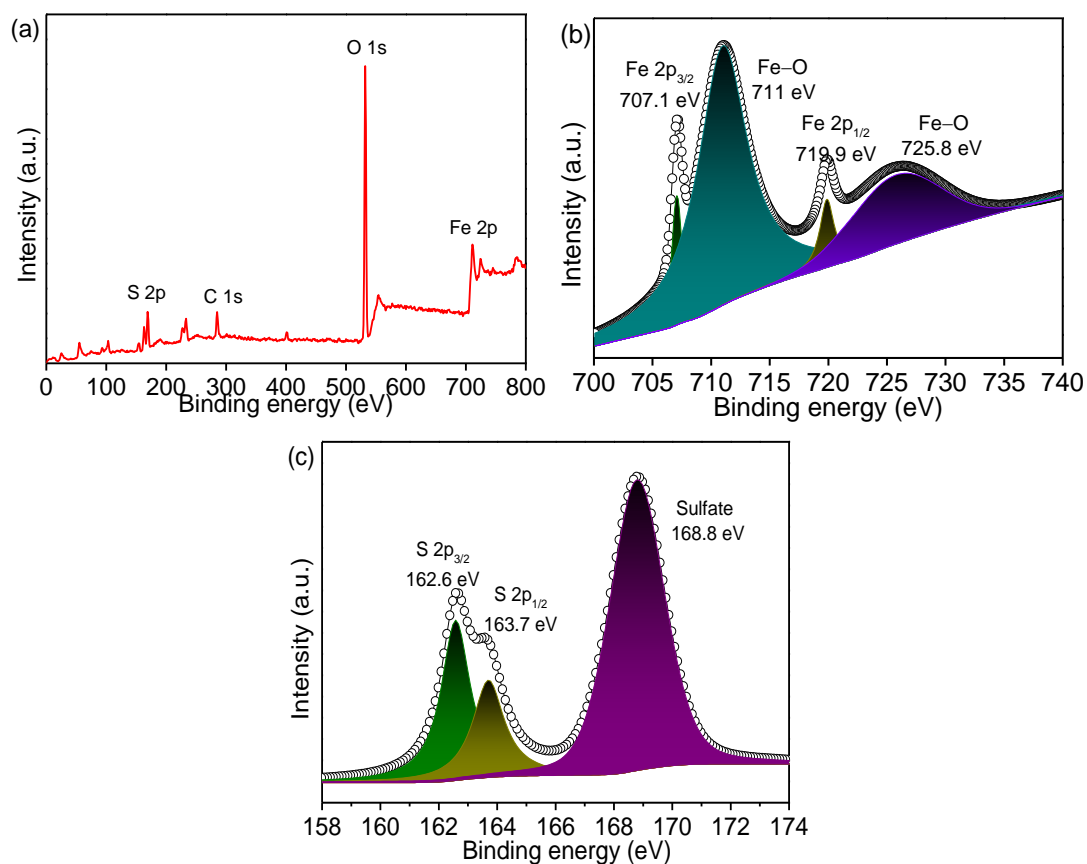

**Fig. S6** (a) XPS survey spectrum. High-resolution spectra of (b) Fe 2p and (c) S 2p of FeS<sub>2</sub>.

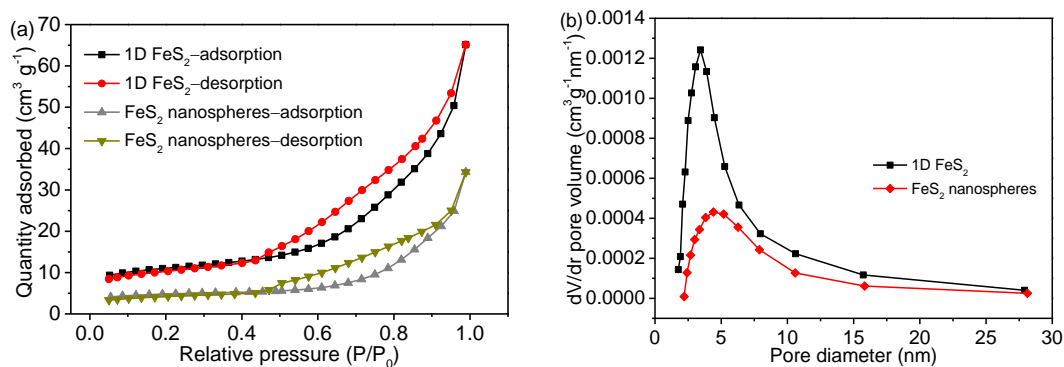

**Fig. S7** (a) The  $\text{N}_2$  adsorption-desorption isotherms. (b) The pore-size distributions.

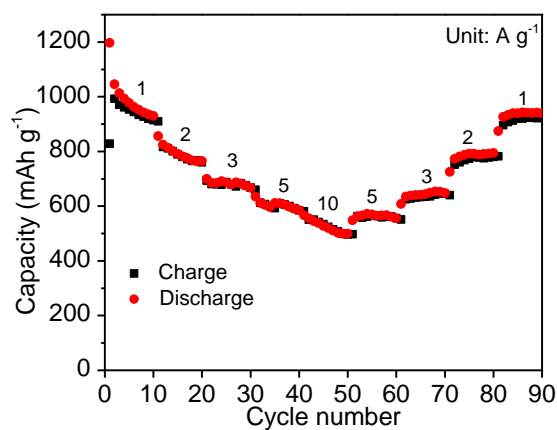

**Fig. S8** Rate-performance of the CWE  $\text{FeS}_2$ .

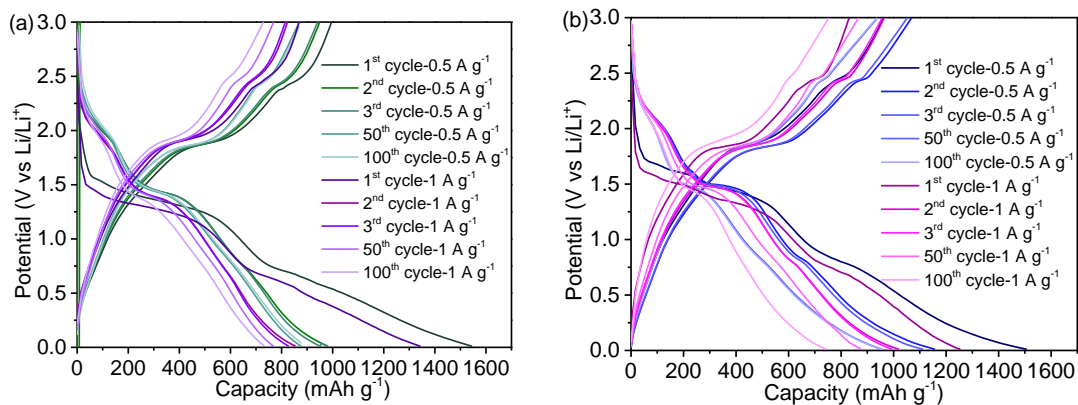

**Fig. S9** Charge-discharge curves of the CWE  $\text{FeS}_2$  at rates of 0.5 and 1  $\text{A g}^{-1}$  under different temperatures: (a)  $-10^\circ \text{C}$  and (b)  $45^\circ \text{C}$ .

**Table S1.** Comparison on the electrochemical performance of some other FeS<sub>2</sub>-based anodes.

| Anode                                              | Preparation method    | Cycling rate<br>(A g <sup>-1</sup> ) | Cycle<br>number | Capacity<br>(mAh g <sup>-1</sup> ) | Ref.          |
|----------------------------------------------------|-----------------------|--------------------------------------|-----------------|------------------------------------|---------------|
| FeS <sub>2</sub> /carbon<br>nanotubes hybrids      | Solvothermal method   | 0.2                                  | 200             | 800                                | 1             |
| FeS <sub>2</sub> @sulfur-doped<br>carbon           | A sulfuration process | 1                                    | 300             | 849                                | 2             |
| Yolk-shell<br>FeS <sub>2</sub> @carbon<br>spheres  | Calcination process   | 0.1                                  | 100             | 560                                | 3             |
| Core-shell FeS <sub>2</sub> @N-<br>graphene        | Hydrothermal route    | 0.5                                  | 400             | 402                                | 4             |
| FeS <sub>2</sub> @bifunctional<br>carbon nanotubes | Solvothermal method   | 1                                    | 500             | 698                                | 5             |
| FeS <sub>2</sub> microspheres                      | Solvothermal method   | 1                                    | 100             | 540                                | 6             |
| Yolk-shell CWE<br>FeS <sub>2</sub>                 | Template method       | 1                                    | 100             | 887                                | This<br>study |
|                                                    |                       | 2                                    | 500             | 805                                |               |

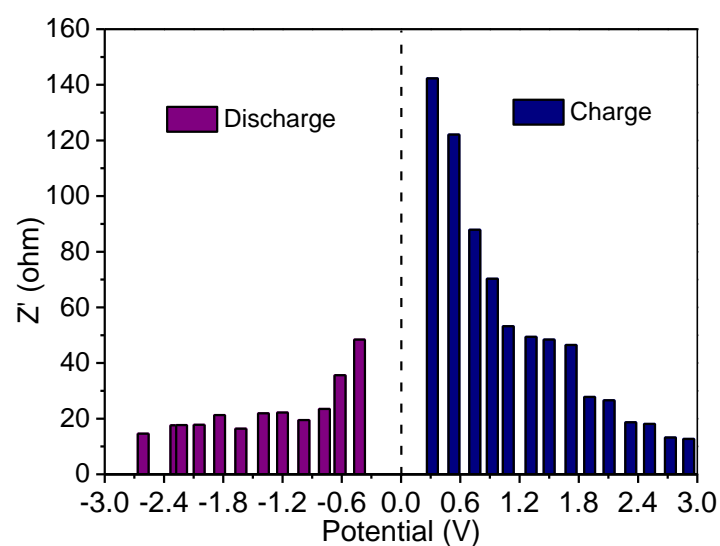**Fig. S10** The charge transfer resistance within one charge-discharge cycle.

**Table S2.** Charge transfer resistance of the CWE FeS<sub>2</sub>-based anode within one charge-discharge cycle.

| Discharging potential (V) | Charge transfer resistance ( $\Omega$ ) | Charging potential (V) | Charge transfer resistance ( $\Omega$ ) |
|---------------------------|-----------------------------------------|------------------------|-----------------------------------------|
| 2.556                     | 14.6                                    | 0.263                  | 142.3                                   |
| 2.225                     | 17.6                                    | 0.481                  | 122.1                                   |
| 2.167                     | 17.7                                    | 0.692                  | 87.9                                    |
| 1.989                     | 17.8                                    | 0.87                   | 70.3                                    |
| 1.782                     | 21.3                                    | 1.031                  | 53.2                                    |
| 1.567                     | 16.4                                    | 1.262                  | 49.4                                    |
| 1.338                     | 21.9                                    | 1.445                  | 48.4                                    |
| 1.145                     | 22.2                                    | 1.667                  | 46.5                                    |
| 0.929                     | 19.5                                    | 1.855                  | 27.8                                    |
| 0.721                     | 23.5                                    | 2.052                  | 26.6                                    |
| 0.563                     | 35.6                                    | 2.271                  | 18.7                                    |
| 0.365                     | 48.4                                    | 2.461                  | 18.1                                    |
| -                         | -                                       | 2.673                  | 13.2                                    |
| -                         | -                                       | 2.858                  | 12.7                                    |

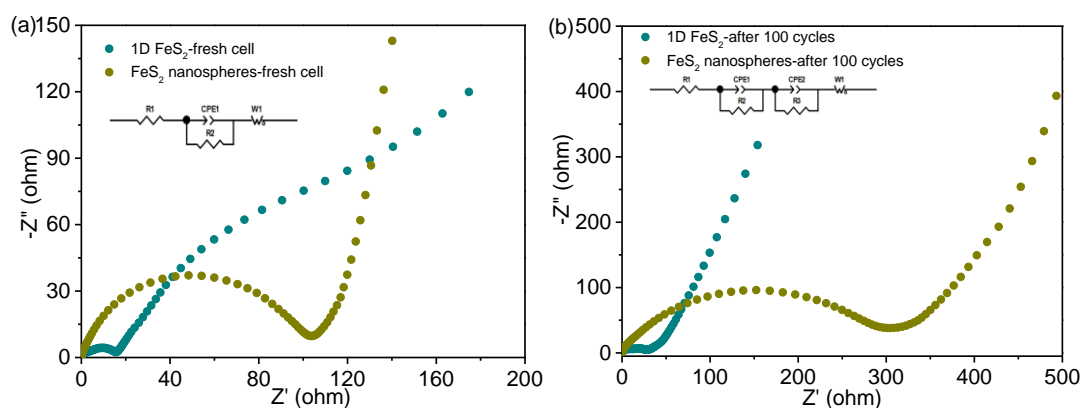

**Fig. S11** EIS spectra of CWE FeS<sub>2</sub> and the FeS<sub>2</sub> nanospheres (a) before and (b) after cycling 100 times at 1 A g<sup>-1</sup>. The inserts display the equivalent circuit models.

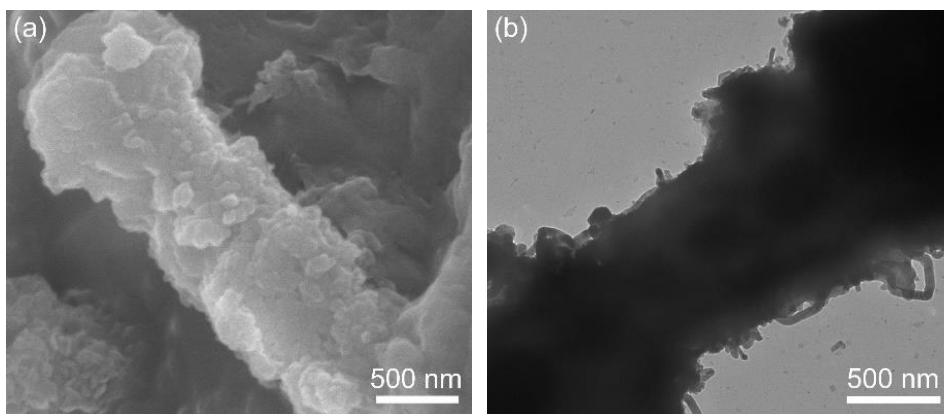

**Fig. S12** (a) SEM and (b) TEM images of the CWE FeS<sub>2</sub> after 100 cycles at 1 A g<sup>-1</sup>.

## References

- 1 L. Xu, Y. J. Hu, H. X. Zhang, H. J and C. Z. Li, *ACS Sustainable Chem. Eng.*, 2016, **4**, 4251–4255.
- 2 W. Chen, Q. Z. Li, H. X. Zhang, X. H. Wu, W. W. Wu and M. Xu, *Energy Fuels*, 2021, **35**, 12599–12609.
- 3 Y. J. Liu, W. Q. Wang, Q. D. Chen, C. Xu, D. P. Cai and H. b, Zhan, *Inorg. Chem.*, 2019, **58**, 1330–1338.
- 4 R. Tan, J. L. Yang, J. T. Hu, K. Wang, Y. Zhao and F. Pan, *Chem. Commun.*, 2016, **52**, 986–989.
- 5 J. H. Lu, F. L, L. L. Guan, Y. X. Zhang and F. Ding, *J. Mater. Chem. A*, 2019, **7**, 991–997.
- 6 Z. Hu, K. Zhang, Z. Q. Zhu, Z. L. Tao and J. Chen, *J. Mater. Chem. A*, 2015, **3**, 12898–12904.
